# Supplementary material for: Structure features of a supramolecular organic framework self-assembled from a chiral natural compound
Source: Royal Society of Chemistry journal article supplement (doi:10.1039/d4ce01008f), 2024-11-20
Supplement: d4ce01008f1.pdf [file d4ce01008f1.pdf]

## Supporting Information

### Structure features of a chiral supramolecular organic framework self-assembled from natural compound

Kenika Khotchasanthong,<sup>a,b</sup> Yupa Pootaeng-On,<sup>c</sup> Kanok-on Rayanil,<sup>c\*</sup> Mongkol Sukwattanasinitt,<sup>d</sup>  
Sakchai Laksee<sup>e</sup> and Kittipong Chainok<sup>\*a,f</sup>

<sup>a</sup>Thammasat University Research Unit in Multifunctional Crystalline Materials and Applications (TU-MCMA), Faculty of Science and Technology, Thammasat University, Pathum Thani 12121, Thailand, E-mail: kc@tu.ac.th; Fax: +662 654 4548; Tel: +66 86 339 5079

<sup>b</sup>Department of Chemistry, Faculty of Science and Technology, Thammasat University, Pathum Thani 12121, Thailand

<sup>c</sup>Department of Chemistry, Faculty of Science, Silpakorn University, Nakhon Pathom 73000, Thailand, E-mail: Rayanil\_k@su.ac.th

<sup>d</sup>Department of Chemistry, Faculty of Science, Chulalongkorn University, Bangkok 10330, Thailand

<sup>e</sup>Nuclear Technology Research and Development Center, Thailand Institute of Nuclear Technology (Public Organization), Nakhon Nayok, 26120, Thailand

<sup>f</sup>Center of Excellence on Petrochemical and Materials Technology, Chulalongkorn University, Bangkok 10330, Thailand

### Extraction and isolation

The dried twigs of *Milium sessilis* (2.4 kg) were extracted using 95% ethanol at room temperature. After evaporating the solvent under vacuum, a crude ethanolic extract (503.2 g) was obtained. This crude extract was then diluted with water and partitioned into hexane, resulting in a hexane extract (50.4 g) after evaporating the hexane under reduced pressure. The hexane extract was further purified using flash column chromatography with a gradient of hexane and ethyl acetate, yielding 10 fractions. Fraction 8 (1.85 g) was subjected to column chromatography with silica gel and a 1-45% ethyl acetate in hexane eluent, resulting in the isolation of **SOF-1** as a white solid (43.3 mg), which was recrystallized in hexane-ethyl acetate to obtain colorless crystals.

### Characterization

$^1\text{H}$  NMR (300 MHz,  $\text{CDCl}_3$ ):  $\delta$  1.45 (1H, m, H-1a), 1.78 (1H, m, H-1b), 1.33 (1H, m, H-2a), 1.65 (1H, m, H-2a), 3.21 (1H, overlapped, H-3), 0.87 (1H, overlapped, H-5), 1.48 (1H, m, H-6a), 1.69 (1H, m, H-6b), 1.65 (1H, m, H-7a), 1.77 (1H, m, H-7b), 2.19 (1H, t,  $J = 6.8$  Hz, H-8), 5.23 (1H, brd,  $J = 5.9$  Hz, H-11), 1.92 (1H, m, H-12a), 2.08 (1H, m, H-12b), 1.34 (1H, m, H-15a), 1.43 (1H, m, H-15b), 1.33 (1H, m, H-16a), 1.87 (2H, m, H-16b), 1.56 (1H, m, H-17), 0.68 (3H, s, H-18), 1.05 (3H, s, H-19), 1.67 (1H, m, H-20), 0.92 (3H, d,  $J = 6.3$  Hz, H-21), 1.01 (1H, m, H-22a), 1.66 (1H, m, H-22b), 3.59 (1H, dd,  $J = 10.3, 1.2$  Hz, H-23), 4.92 (1H, s, H-24<sup>1</sup>a), 4.98 (1H, s, H-24<sup>1</sup>b), 2.17 (1H, m, H-25), 1.05 (3H, d,  $J = 7.1$  Hz, H-26), 1.88 (3H, d,  $J = 7.1$  Hz, H-27), 0.99 (3H, s, H-28), 0.82 (3H, s, H-29), 0.73 (3H, s, H-30).  $^{13}\text{C}$  NMR (75 MHz,  $\text{CDCl}_3$ ):  $\delta$  36.2 (C-1), 28.1 (C-2), 78.9 (C-3), 39.1 (C-4), 52.5 (C-5), 21.4 (C-6), 27.8 (C-7), 41.8 (C-8), 148.6 (C-9), 39.4 (C-10), 114.9 (C-11), 37.3 (C-12), 44.6 (C-13), 47.1 (C-14), 33.9 (C-15), 28.1 (C-16), 51.7 (C-17), 14.5 (C-18), 22.3 (C-19), 33.0 (C-20), 18.3 (C-21), 43.2 (C-22), 81.7 (C-23), 56.3 ( $\text{OCH}_3$ -23), 156.6 (C-24), 107.4 (C-24<sup>1</sup>), 29.9 (C-25), 23.5 (C-26), 22.5 (C-27), 28.3 (C-28), 15.7 (C-29), 18.5 (C-30). HRESIMS  $[\text{M}+\text{NH}_4]^+$   $m/z$  488.4462 (calcd. for  $\text{C}_{32}\text{H}_{58}\text{NO}_2$ , 488.4467).

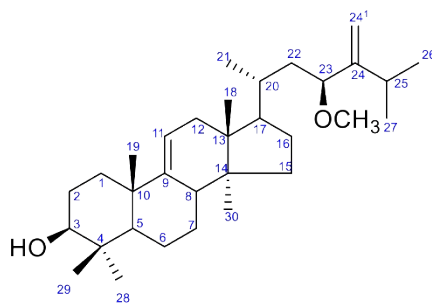

|                                       |                                                                                                                                                          |
|---------------------------------------|----------------------------------------------------------------------------------------------------------------------------------------------------------|
| IUPAC name:                           | (36,23S)-23-methoxy-24-methylenelanost-9-en-3-ol                                                                                                         |
| Common name:                          | -                                                                                                                                                        |
| Appearance:                           | colorless rod (ethanol/ethyl acetate)                                                                                                                    |
| Melting Point:                        | 192-193 °C                                                                                                                                               |
| Optical rotation:                     | $[\alpha]_{\text{D}}^{23} +84.2$ (c 0.06, CHCl <sub>3</sub> )                                                                                            |
| CD:                                   | -                                                                                                                                                        |
| UV:                                   | -                                                                                                                                                        |
| IR:                                   | (thin film): $\nu_{\text{max}}$ , cm <sup>-1</sup> ;<br>3323, 2917, 2866, 1639, 1462, 1369, 1111, 1087, 1040, 901, 757                                   |
| HRESIMS:                              | $m/z$ (relative intensity), 70 eV;<br>488.4462 [M+NH <sub>4</sub> ] <sup>+</sup> (calcd. for C <sub>32</sub> H <sub>58</sub> NO <sub>2</sub> , 488.4467) |
| Chemical Formula:                     | C <sub>31</sub> H <sub>52</sub> O <sub>2</sub>                                                                                                           |
| Exact Mass:                           | 456.3967 g/mol                                                                                                                                           |
| <sup>1</sup> H NMR spectroscopic data | $\delta$ ppm, 300 Hz in CDCl <sub>3</sub>                                                                                                                |

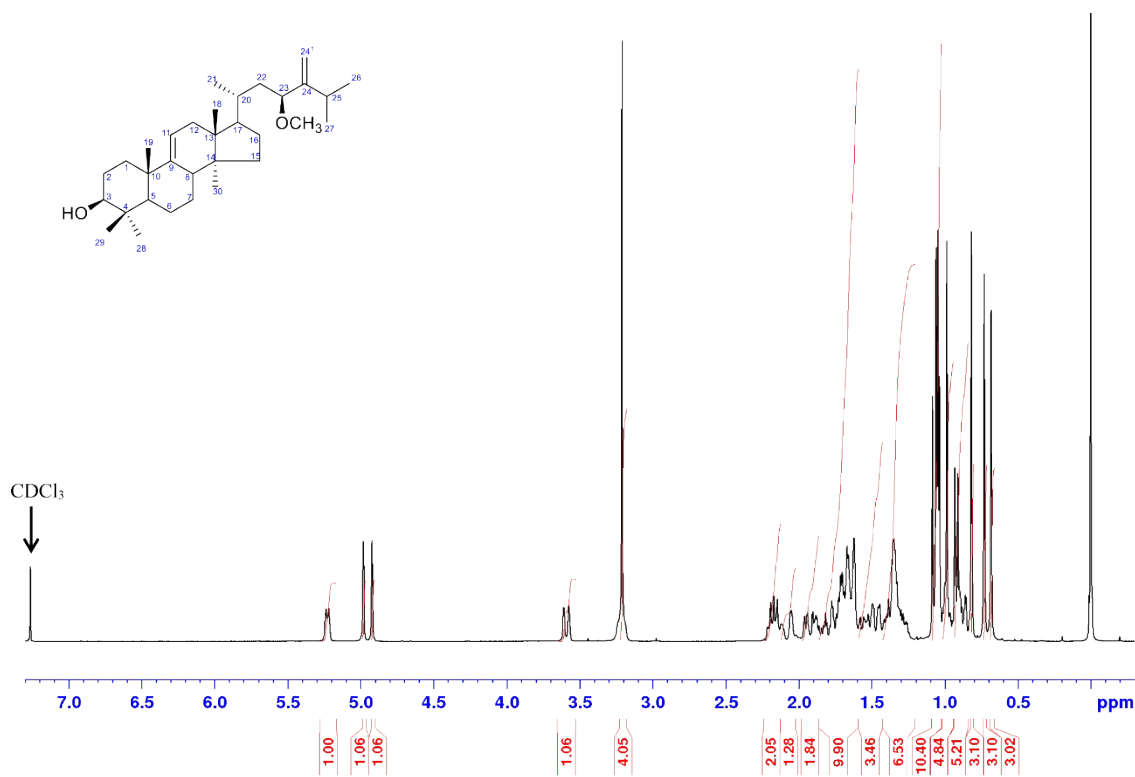

$^1\text{H}$  NMR spectrum for **1** (300 MHz,  $\text{CDCl}_3$ )

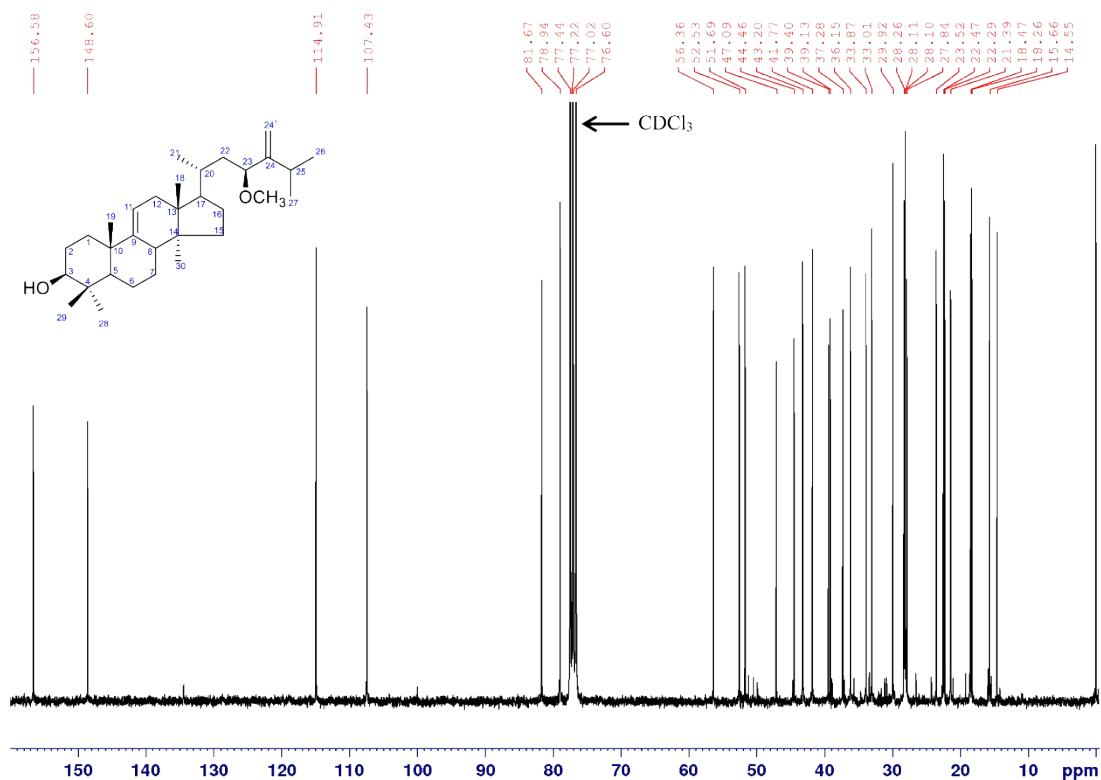

$^{13}\text{C}$  NMR spectrum for **1** (75 MHz,  $\text{CDCl}_3$ )

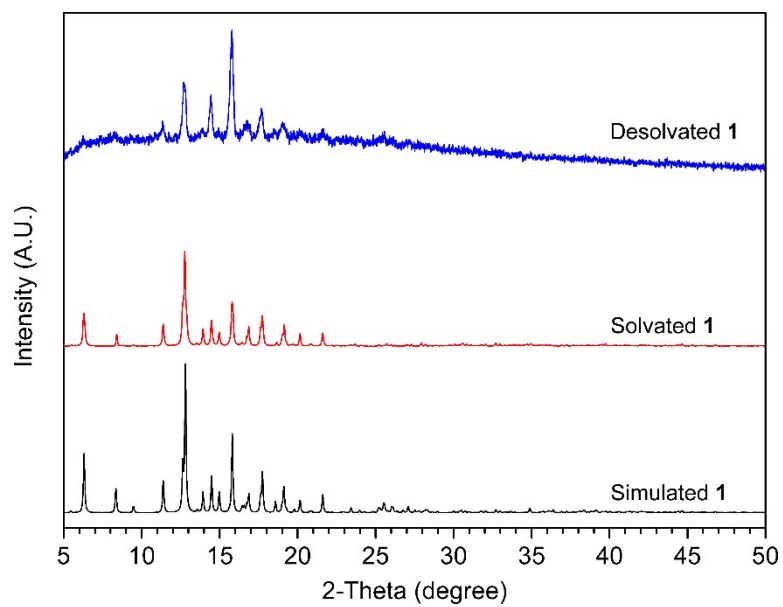

**Fig. S1** Comparison of the simulated, 1 and desolvated PXRD patterns for **SOF-1**.

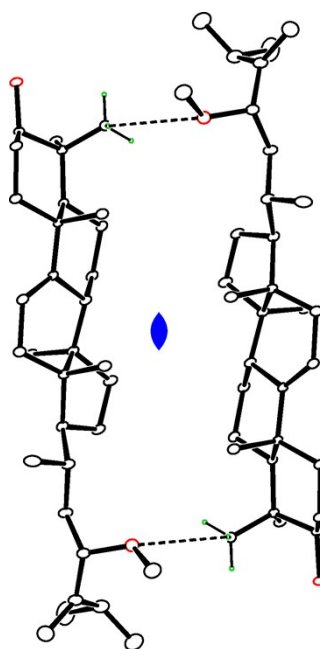

**Fig. S2** Symmetry-related molecules form a C–H···O hydrogen bond **SOF-1**.

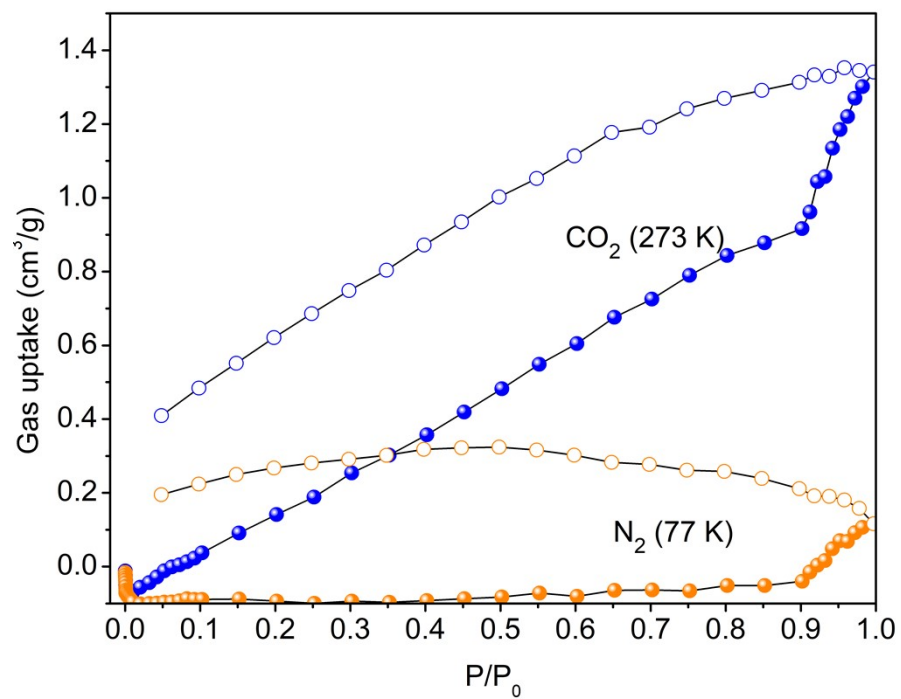

**Fig. S3** N<sub>2</sub> (77 K) and CO<sub>2</sub> (273 K) adsorption isotherms of SOF-1.
